# Supplementary material for: Cu2Zn(Sn1−xSix)Se4: Structural Characterization, Vibrational and Physical Properties of CZTSe-Derivatives
Source: MDPI journal article supplement (doi:10.3390/inorganics11010007), 2022-12-23
Supplement: s1 [file s1]

Archive with 1 entries (1 files):
- inorganics-2080545-supplementary.pdf
