# Supplementary figures and images for: Cu2Zn(Sn1−xSix)Se4: Structural Characterization, Vibrational and Physical Properties of CZTSe-Derivatives
Source: MDPI journal article supplement (doi:10.3390/inorganics11010007), 2022-12-23

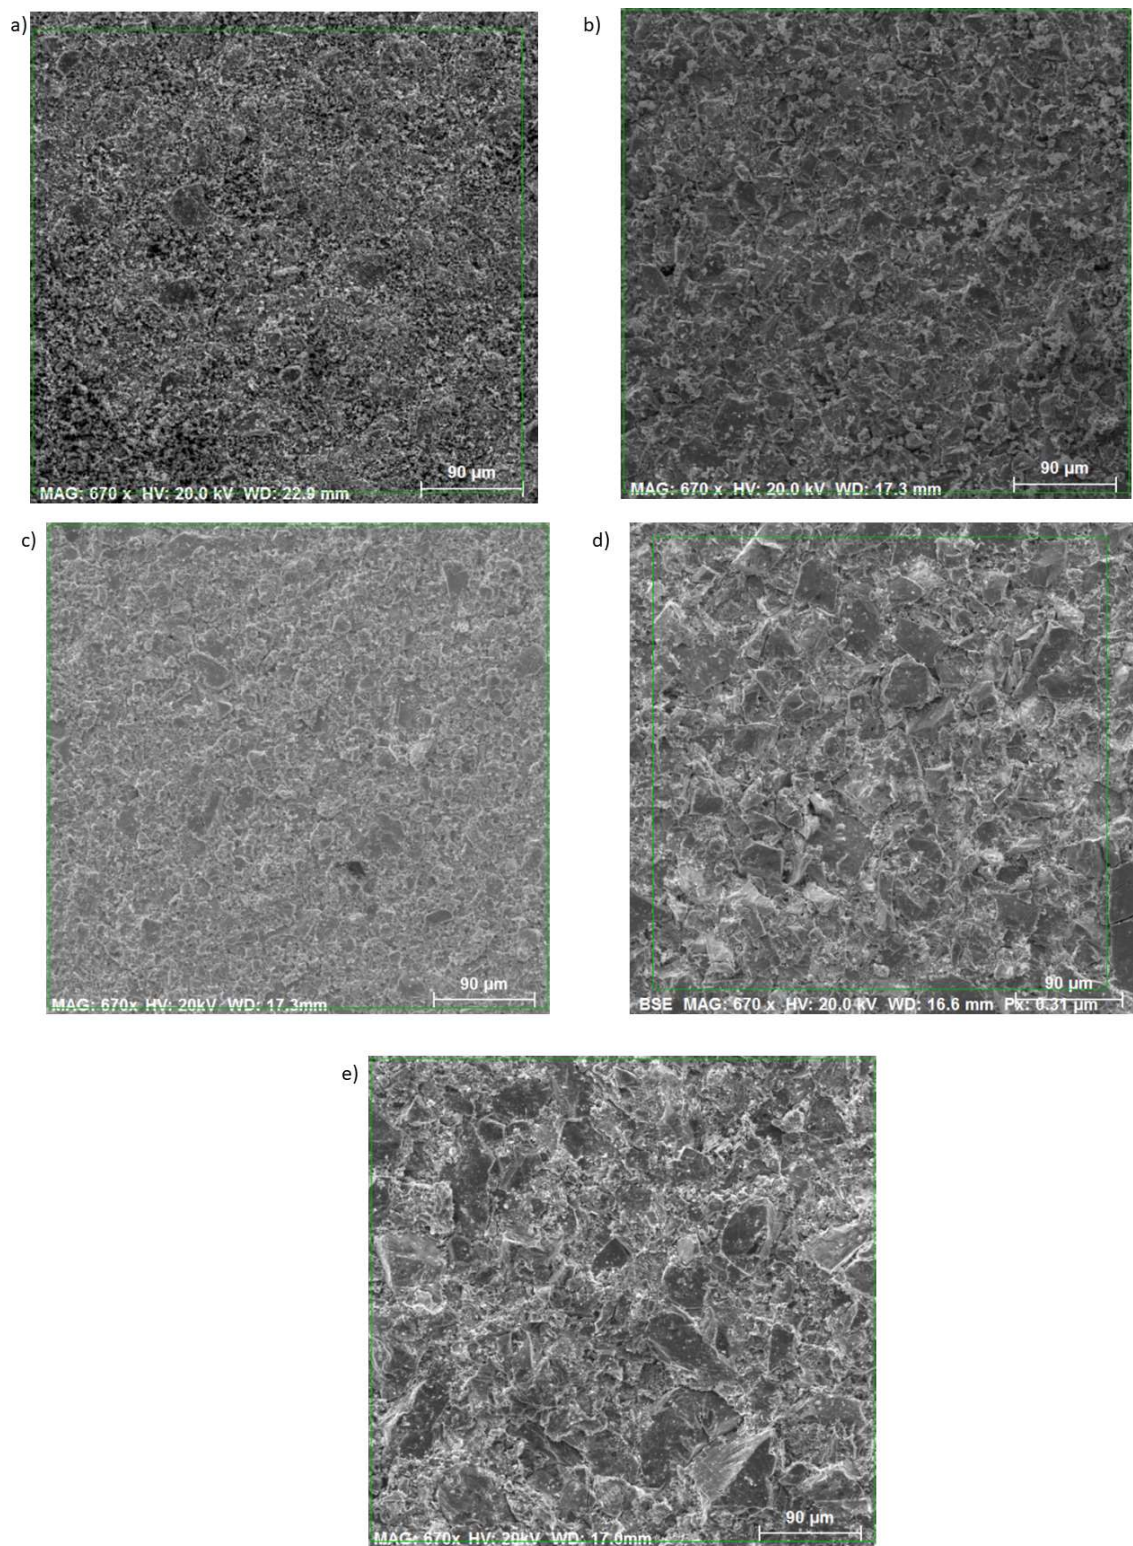

**Figure S1.** Backscattered images for  $\text{Cu}_2\text{ZnSn}_{1-x}\text{Si}_x\text{Se}_4$ ,  $0.2 \leq x \leq 0.8$  (a–e).

Supplement: s1 [file s1 › inorganics-2080545-supplementary.pdf]
